# Supplementary material for: Interpolyelectrolyte complexes based on hyaluronic acid-block-poly(ethylene glycol) and poly-l-lysine
Source: Royal Society of Chemistry journal article supplement (doi:10.1039/c3sm27549c), 2013-01-01
Supplement: c3sm27549c.pdf [file c3sm27549c.pdf]

## Electronic Supplementary Information

# Interpolyelectrolyte Complexes Based on Hyaluronic acid-*b*- Poly(ethylene glycol) and Poly-L-lysine

*Ramon Novoa-Carballal, Dmitry V. Pergushov and Axel H. E. Müller*

### 1. IPEC Stability on dilution and storage

**Table S1.** IPECs formed at 1 g/L total polymer concentration were measured after different times to study the stability of the complexes. Samples were kept at 0 °C between the 7 days and 4 months measurements.

| HA- <i>b</i> -PEG                               | Size (D.I) after 24 h | Size (D.I) after 7 days | Size (D.I) after 4 months |
|-------------------------------------------------|-----------------------|-------------------------|---------------------------|
| HA <sub>6k</sub> - <i>b</i> -PEG <sub>5k</sub>  | 85 (0.08)             | 105 (0.14)              | 101 (0.18)                |
| HA <sub>9k</sub> - <i>b</i> -PEG <sub>5k</sub>  | 47 (0.02)             | 48 (0.02)               | ----                      |
|                                                 | 47 (0.03)             | ---                     | 52 (0.02)                 |
| HA <sub>54k</sub> - <i>b</i> -PEG <sub>5k</sub> | 105 (0.04)            | 122 (0.06)              | 120 (0.04)                |
|                                                 | 112 (0.04)            | 115 (0.07)              | ---                       |

**Table S2.** IPEC solutions were diluted to *ca.* 0.1 g/L and DLS was measured after different times.

| HA- <i>b</i> -PEG                               | Size (D.I) after<br>24 h | Size (D.I) after<br>24 h | Size (D.I)<br>after 7 days | Size (D.I) after 4<br>months |
|-------------------------------------------------|--------------------------|--------------------------|----------------------------|------------------------------|
| HA <sub>9k</sub> - <i>b</i> -PEG <sub>5k</sub>  | 47 (0.02)                | 51 (0.04)                | 57 (0.05)                  | 67 (0.05)                    |
| HA <sub>54k</sub> - <i>b</i> -PEG <sub>5k</sub> | 112 (0.04)               | 111 (0.02)               | 114 (0.02)                 | 120 (0.04)                   |
